# Supplementary material for: Psychological stress impairs IL22-driven protective gut mucosal immunity against colonising pathobionts
Source: PubMed Central journal article supplement (PMC8602651; doi:10.1038/s41467-021-26992-4), 2021-11-18
Supplement: 41467_2021_26992_MOESM1_ESM.pdf [file 41467_2021_26992_MOESM1_ESM.pdf]

## **Supplementary Information for:**

### **Psychological stress impairs IL22-driven protective gut mucosal immunity against colonising pathobionts**

Christopher R. Shaler <sup>1,2,+</sup>, Alexandra A. Parco <sup>1,2,+</sup>, Wael Elhenawy <sup>1,2</sup>, Jasmeen Dourka <sup>1,2</sup>,  
Jennifer Jury <sup>3</sup>, Elena F. Verdu <sup>3</sup>, Brian K. Coombes <sup>1,2,3,\*</sup>

<sup>1</sup> Department of Biochemistry and Biomedical Sciences, McMaster University, Hamilton, ON, Canada; <sup>2</sup> Michael G. DeGrootte Institute for Infectious Disease Research, Hamilton, ON, Canada;

<sup>3</sup> Farncombe Family Digestive Health Research Institute, Hamilton, ON, Canada

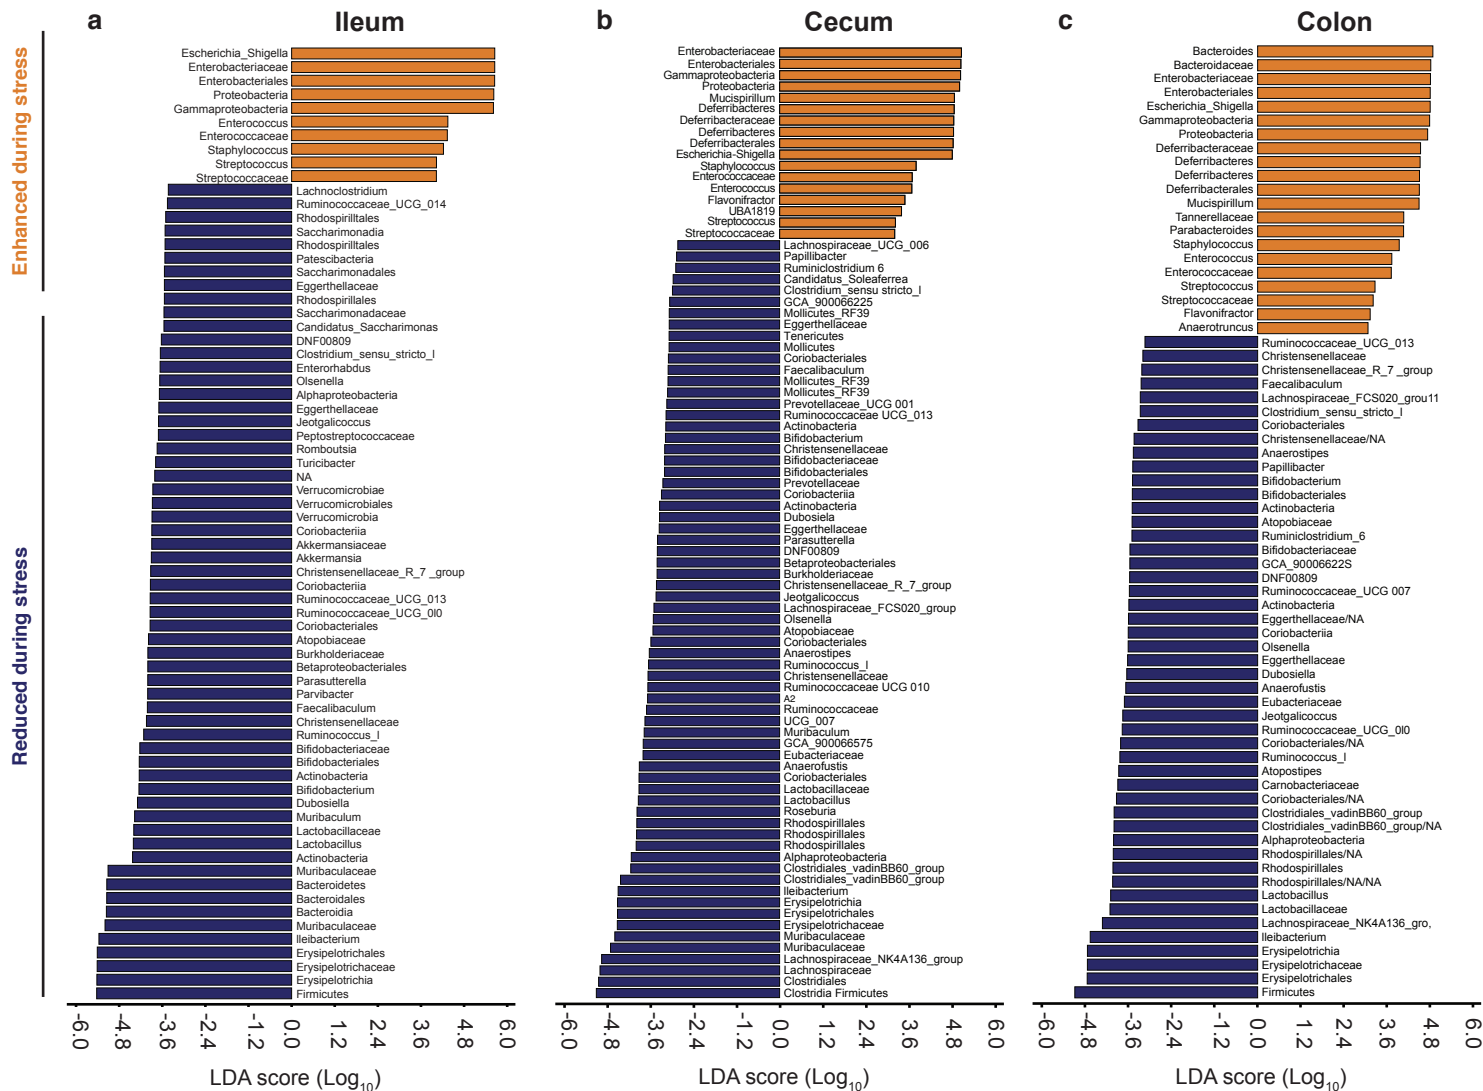

**Supplementary Figure 1.** Psychological stress alters the microbial composition of the gut. LefSe analysis of significantly altered bacterial populations in the ileum (a), cecum (b), and colon (c) of stressed mice (n = 4) as compared to starved controls (n = 4). Starved and stress samples are the same as those in Figure 1.

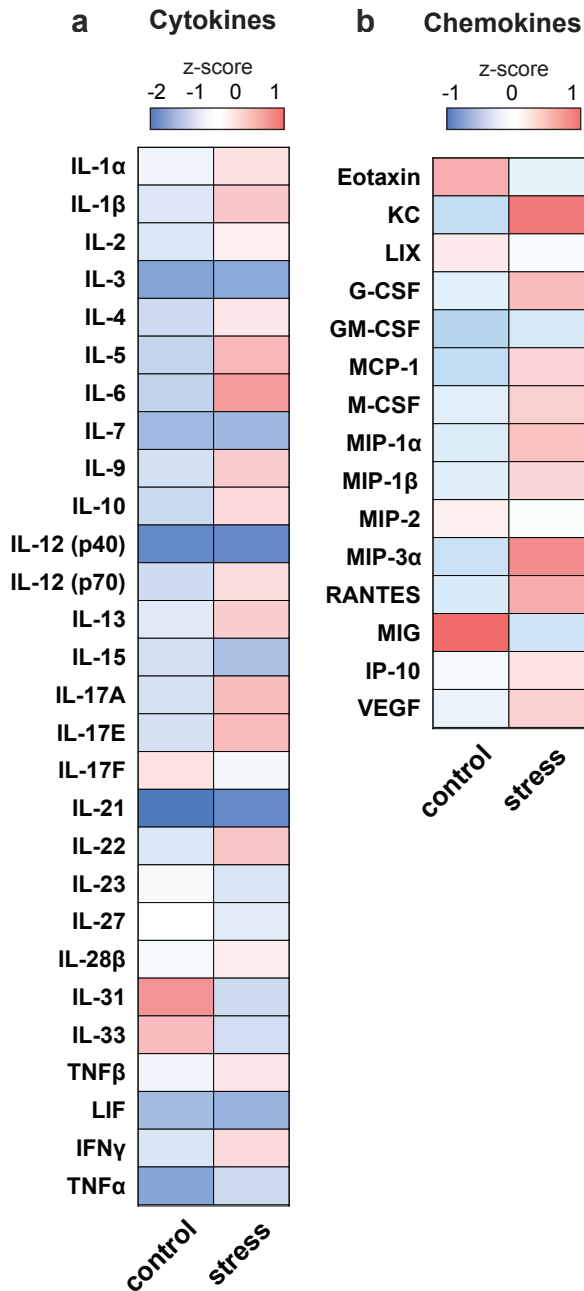

**Supplementary Figure 2.** Psychological stress induces the release of pro-inflammatory cytokines within the serum. **a**, Mean z-scores of cytokine levels within the serum of control (n = 6) and stress (n = 7) mice as determined by Multiplex analysis. **b**, Mean z-scores of chemokine levels within the serum of control (n = 6) and stress (n = 7) mice as determined by Multiplex analysis.

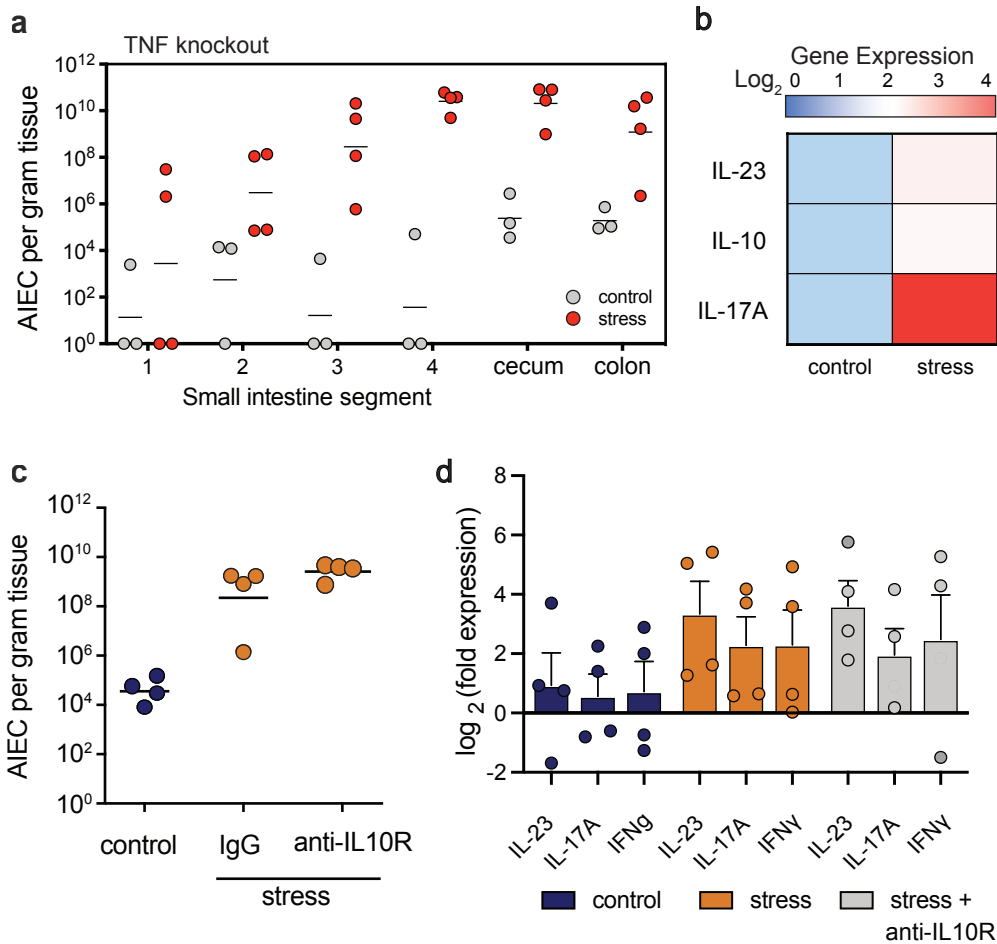

**Supplementary Figure 3.** TNF does not contribute to stress induced AIEC expansion. **a**, AIEC tissue burdens collected from the length of the intestinal tract from control (n = 3) and stress (n = 4) TNFko mice. The small intestine was divided into four 8 cm segments in which Segment 4 is adjacent to the cecum. **b**, RT-qPCR analysis of cytokine expression within the ileum of control (n = 2) and stress (n = 4) TNFKO mice. **c**, AIEC tissue burdens collected from the ileum of control (n = 4), stress + IgG (n = 4), and stress + IL-10R (n = 4). **d**, RT-qPCR analysis of cytokine expression within the ileum of control (n = 4), stress + IgG (n = 4), and stress + anti-IL-10R (n = 4). Error bars represent SEM and the line in CFU graphs indicates the geometric mean of the group.

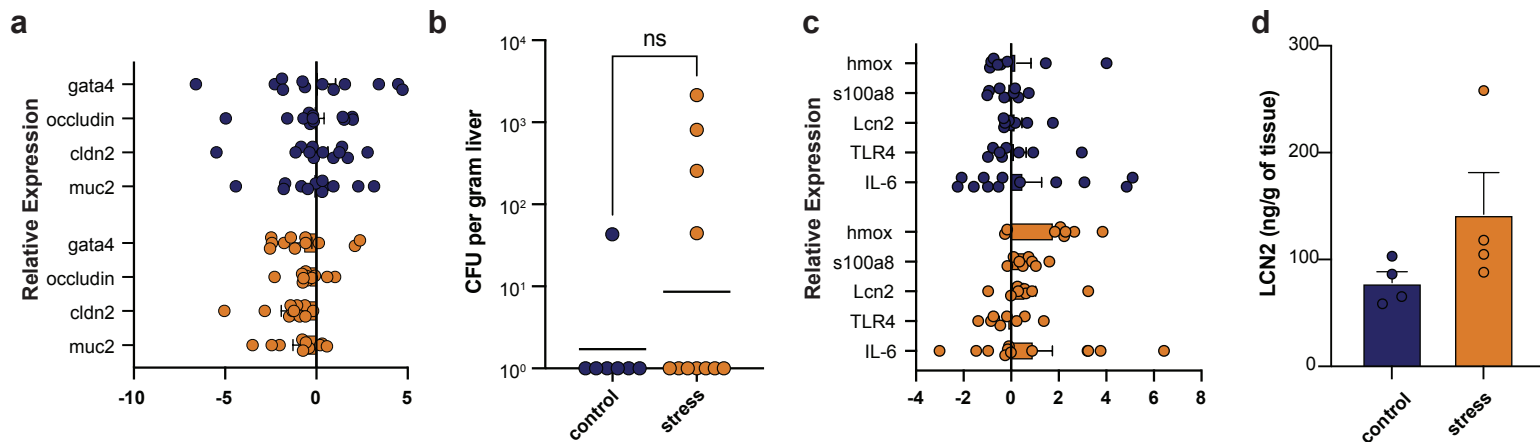

**Supplementary Figure 4.** Psychological stress leads to modest impairment of barrier function and induction of nutritional immunity in naïve mice. **a**, RT-qPCR analysis of barrier genes from ileal samples of naïve starved (n = 12) and stress (n = 11) mice. **b**, Bacterial burdens in the liver were enumerated in naïve starved (n = 12) or stressed (n = 12) mice. Significance was determined by a two-sided Mann-Whitney. **c**, RT-qPCR analysis of nutritional immunity genes from ileal samples of naïve starved (n = 8) and stress (n = 8) mice. **d**, Quantification of Lcn2 by ELISA in the ileum of naïve starved (n = 4) and stress (n = 4) mice. Error bars represent SEM and the line in CFU graphs indicates the geometric mean of the group.

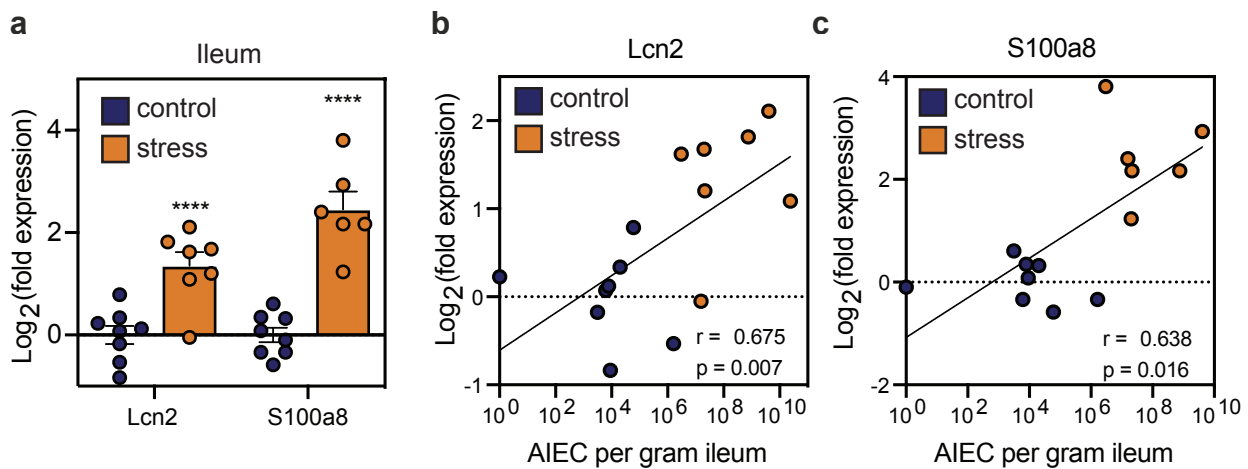

**Supplementary Figure 5.** Psychological stress induces nutritional immunity. **a**, RT-qPCR analysis of *Lcn2* and *S100a8* from ileal samples of AIEC-colonized starved ( $n = 4$ ) or stressed ( $n = 4$ ) mice. Significance was determined by a two-way ANOVA,  $p < 0.0001$  (*Lcn2*);  $p < 0.0001$  (*S100a8*). **b**, Spearman's two tailed correlation of RT-qPCR *Lcn2* transcript expression and AIEC fecal burdens within the ileum ( $n = 8$ ). **c**, Spearman's two tailed correlation of RT-qPCR *S100a8* transcript expression and AIEC fecal burdens within the ileum ( $n = 8$ ). (\*  $p \leq 0.05$ ; \*\*  $p \leq 0.01$ ; \*\*\*  $p \leq 0.001$ ; \*\*\*\*  $p \leq 0.0001$ ). Error bars represent SEM.

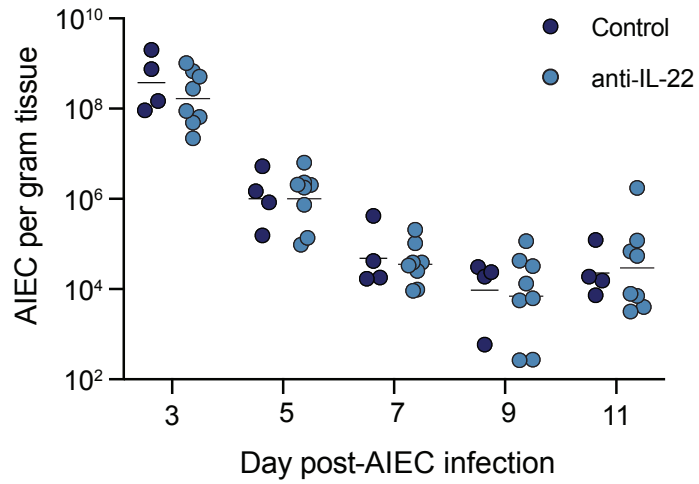

**Supplementary Figure 6.** IL-22 neutralization alone does not cause AIEC expansion. Fecal AIEC burdens collected from AIEC-colonized control (n = 4) and IL-22 treated (n = 8) over the course of 11 days.

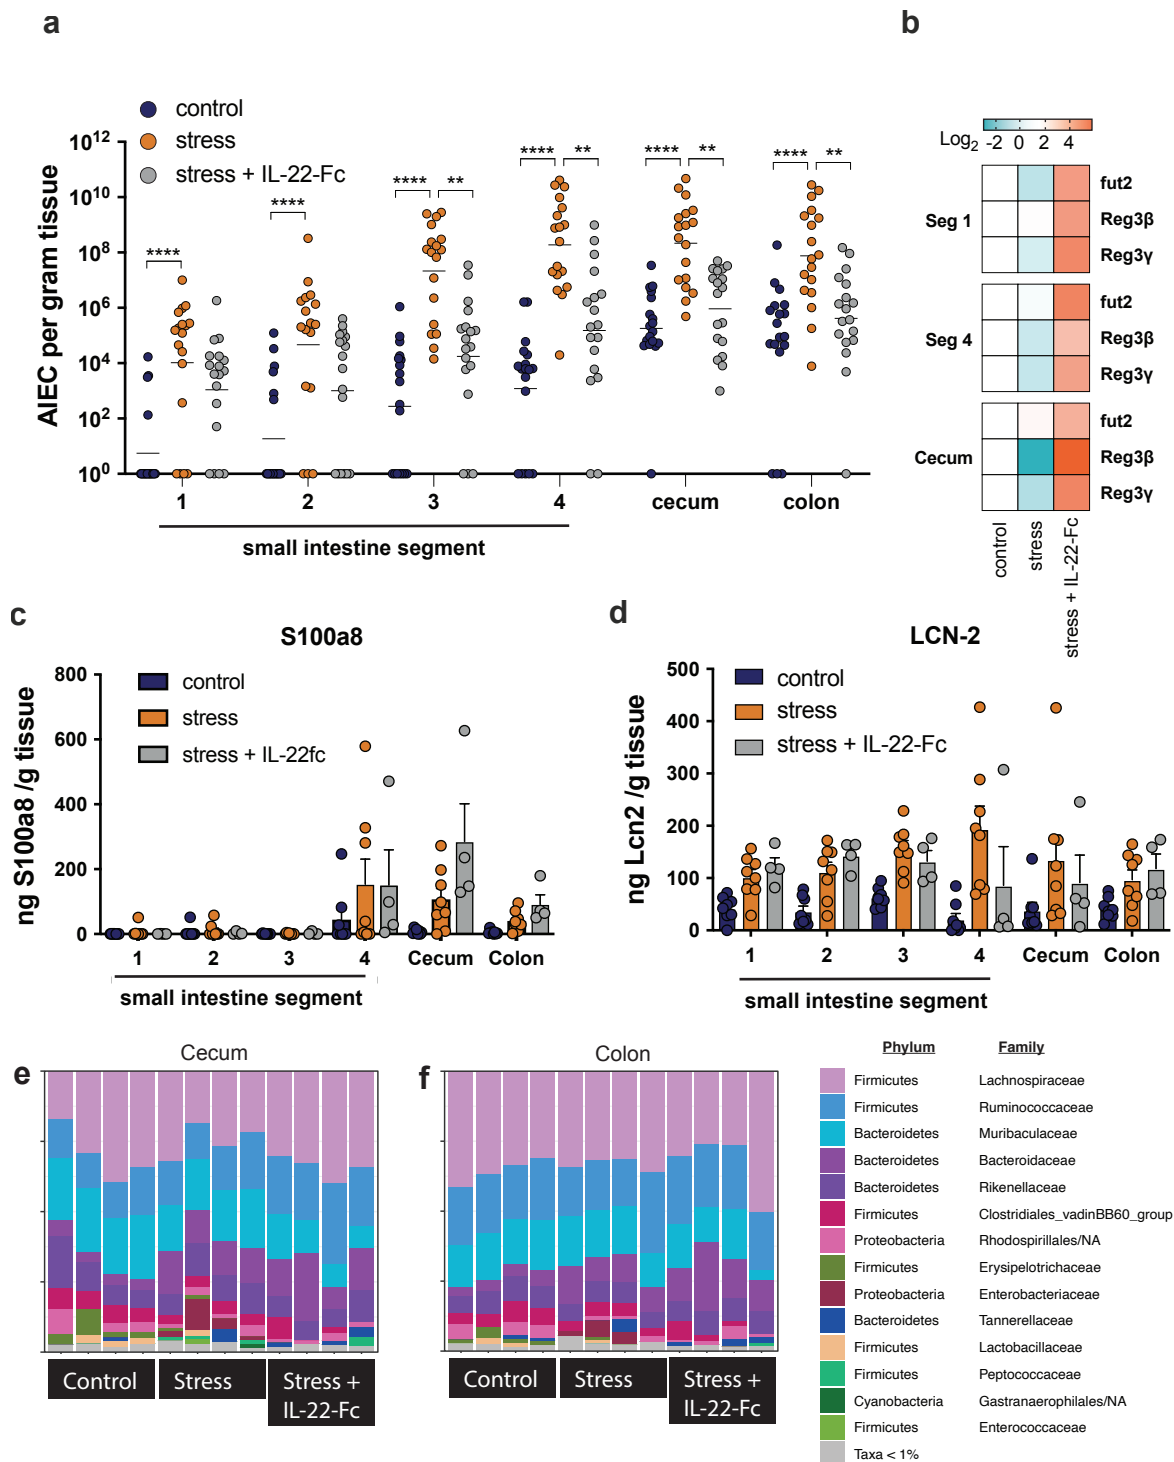

**Supplementary Figure 7. IL-22 induces the production of AMPs and limits AIEC expansion.**

**a**, AIEC tissue burdens collected from the length of the intestinal tract from control ( $n = 18$ ), stress ( $n = 18$ ), and IL-22 treated stress ( $n = 18$ ) mice. The small intestine was divided into four 8 cm segments in which Segment 4 is adjacent to the cecum. Significance was determined by one-way ANOVA, within each segment. Segment 1 - Control:stress  $p < 0.0001$ ; Segment 2 - Control:Stress  $p < 0.0001$ , Stress:Stress + IL-22-Fc  $p = 0.023$ ; Segment 3 - Control:Stress  $p < 0.0001$ , Stress:Stress + IL-22-Fc  $p = 0.0012$ ; Segment 4 - Control:Stress  $p < 0.001$ , Stress:Stress + IL-22-Fc  $p = 0.001$ ; Cecum - Control:Stress  $p < 0.0001$ , Stress:Stress + IL-22-Fc  $p = 0.0006$ ; Colon - Control:Stress  $p < 0.0001$ , Stress:Stress+IL-22-Fc  $p = 0.0021$  **b**, RT-qPCR analysis of AMP expression in ileal samples of AIEC-colonized starved ( $n = 4$ ), IgG treated stress ( $n = 4$ ), and IL-22 treated stress ( $n = 4$ ) mice. Stress and control samples are the same as Figure 4B. **c**, Quantification of calprotectin subunit S100a8 by ELISA along the length of the intestinal tract in AIEC-colonized starved ( $n = 8$ ), stress ( $n = 8$ ), and IL-22 treated stress ( $n = 4$ ) mice. Control and stress samples are the same as Figure 4D. **d**, Quantification of Lcn2 by ELISA along the length of the intestinal tract in AIEC-colonized starved ( $n = 8$ ), stress ( $n = 8$ ), and IL-22 treated stress ( $n = 4$ ) mice. Control and stress samples are the same as Figure 4C. **e**, **f**, Taxonomy plots of 16S rRNA sequencing of the cecal **e** and colonic **f** contents of starved ( $n = 4$ ), IgG treated stress ( $n = 4$ ), and IL-22 treated stress ( $n = 4$ ) mice. The small intestine was divided into four 8 cm segments in which Segment 4 was adjacent to the cecum. (\*  $p \leq 0.05$ ; \*\*  $p \leq 0.01$ ; \*\*\*  $p \leq 0.001$ ; \*\*\*\*  $p \leq 0.0001$ ). Error bars represent SEM and the line in CFU graphs indicates the geometric mean of the group.



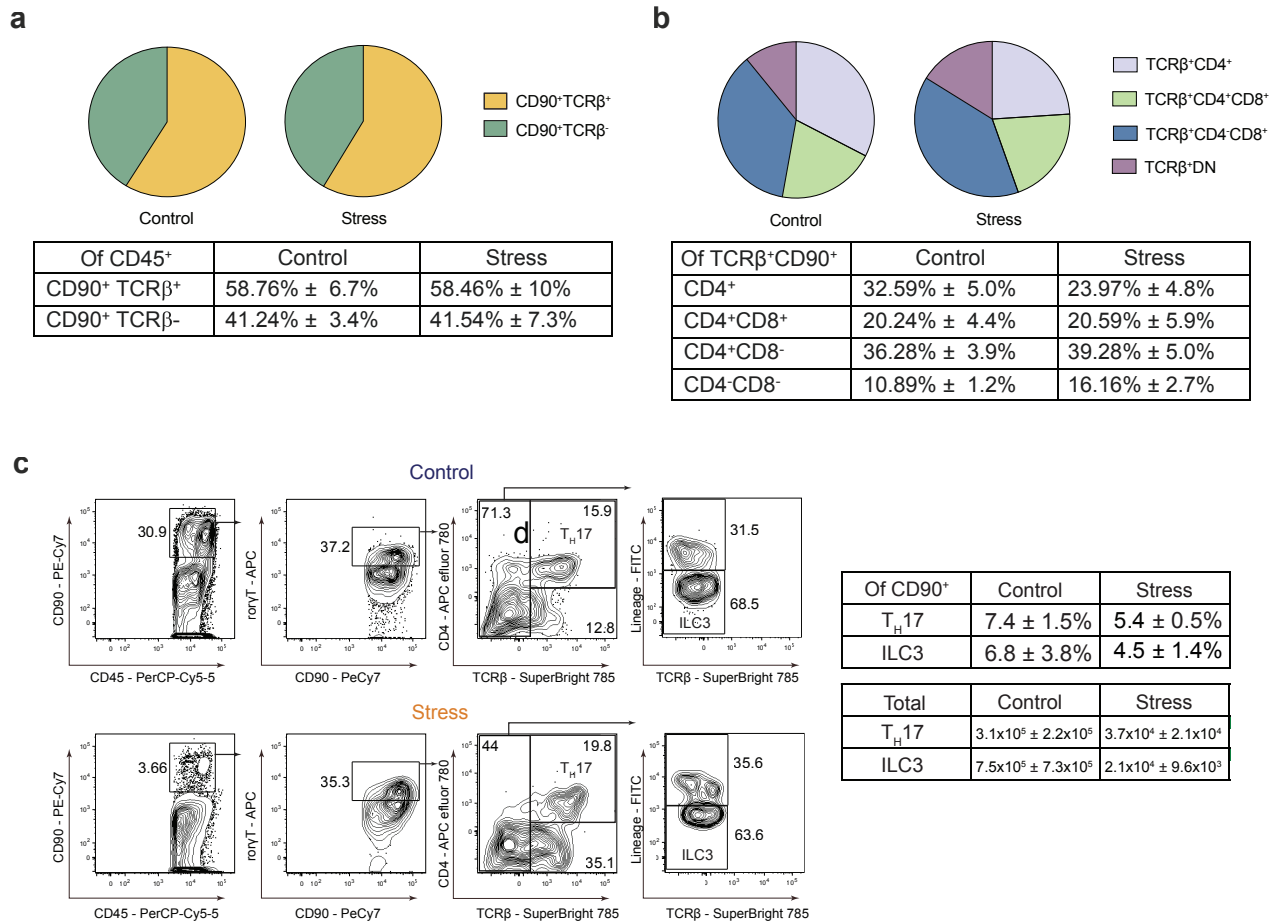

**Supplementary Figure 8. Psychological stress leads to an unbiased loss of the CD90+ immune population.** **a**, Proportion of CD90+TCRβ+ and CD90+TCRβ- in control (n = 10) and stress (n = 5) mice. **b**, Proportion of CD90+TCRβ+ that are CD4+, CD8+, CD4+CD8+, or CD4-CD8- in control (n = 10) and stress groups (n = 5). **c**, Gating strategy for TH17 and ILC3 from CD45+CD90+ cells.

**a. Gating of CD90<sup>+</sup> lymphocytes**

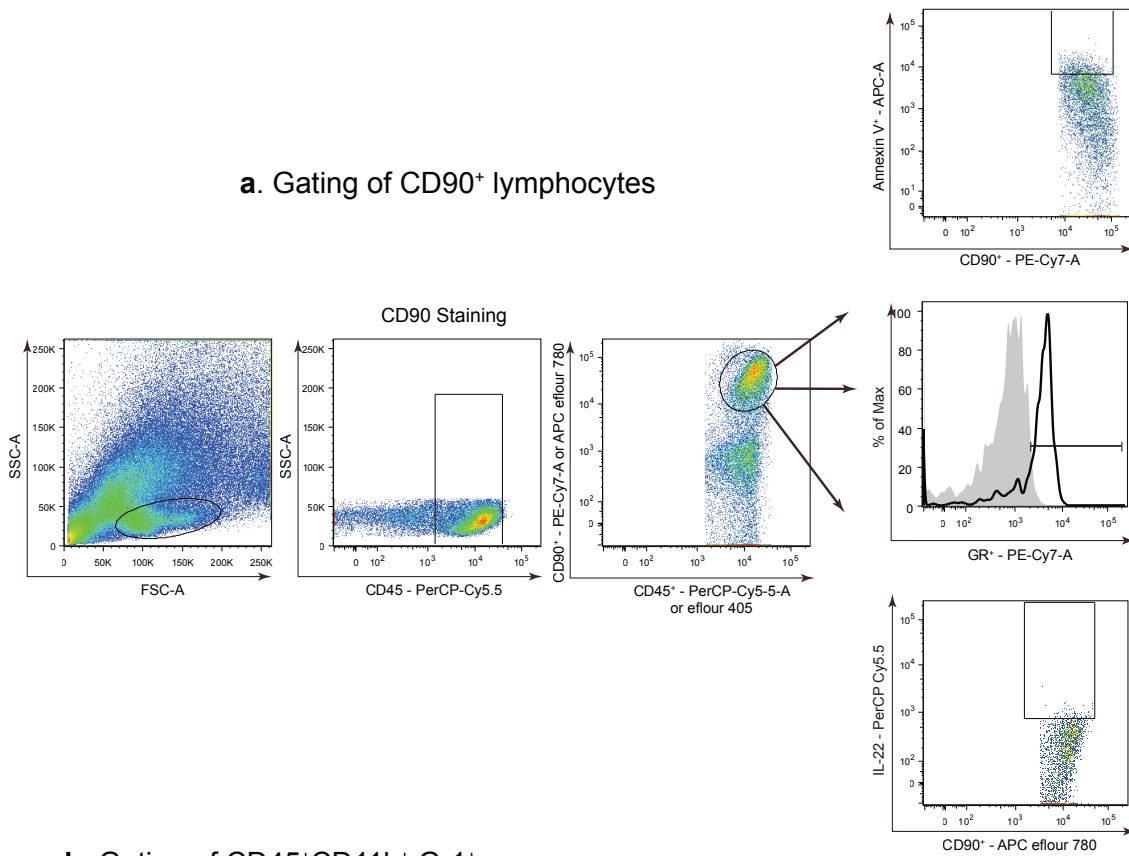

**b. Gating of CD45<sup>+</sup>CD11b<sup>+</sup> Gr1<sup>+</sup>**

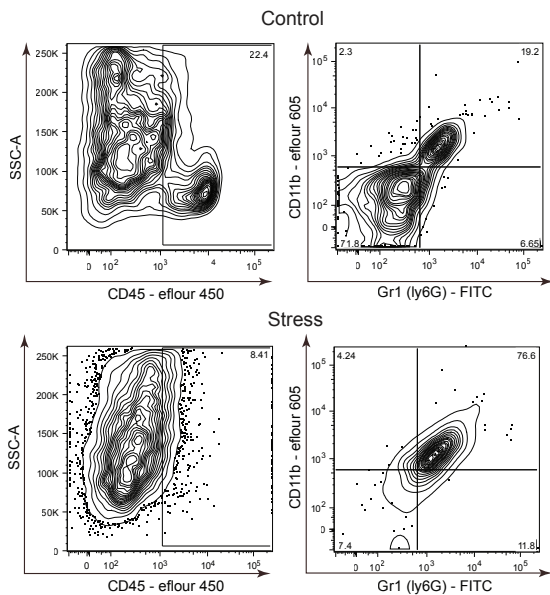

**c. Gating of CD45<sup>-</sup>EpCam<sup>+</sup>pSTAT-3<sup>+</sup>**

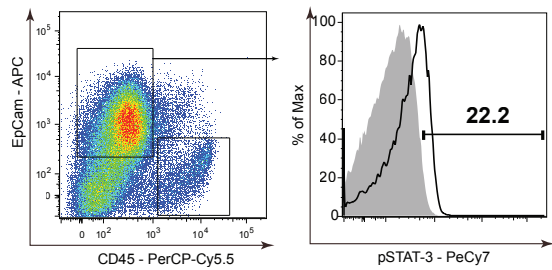

**Supplementary Figure 9. FACS gating strategies.** **a**, The gating methods used for defining CD90<sup>+</sup> lymphocytes and their expression of IL-22, glucocorticoid receptor, or annexin V. **b**, The gating methods used for CD45<sup>+</sup>CD11b<sup>+</sup>Gr1 (ly6G)<sup>+</sup> cells. **c**, The gating methods used to determine pSTAT-3 expression on CD45<sup>-</sup>EpCam<sup>+</sup> epithelial cells.
